# Supplementary material for: Metal complexation by histidine-rich peptides confers protective roles against cadmium stress in Escherichia coli as revealed by proteomics analysis
Source: PeerJ journal article supplement (doi:10.7717/peerj.5245), 2018-07-26
Supplement: Supplementary.zip [file Supplementary.zip]



MASCOT Search Results

Protein View: gi|445923422

elongation factor Tu, partial [Escherichia coli]

Database: NCBI

Score: 271

Nominal mass (M<sub>r</sub>): 41052

Calculated pI: 5.07

Taxonomy: [Escherichia coli](#)

This protein sequence matches the following other entries:

- [gi|378195286](#) from [Escherichia coli DEC13D](#)

Sequence similarity is available as [an NCBI BLAST search of gi|445923422 against nr](#).

Search parameters

MS data file: 13-1.mgf

Enzyme: Trypsin: cuts C-term side of KR unless next residue is P.

Fixed modifications: [Carbamidomethyl \(C\)](#)

Variable modifications: [Oxidation \(M\)](#)

Protein sequence coverage: 18%

Matched peptides shown in **bold red**.

1 DHGKTTLTAA ITTVLAKTYG GAAR**AFDQID** **NAPEEK**ARGI TINTSHVEYD

51 TPTRHYAHVD CPGHADYVKN MITGAAQMDG AILVVAATDG PMPQTRHIL

101 LGRQVGVPYI IVFLNKCMMV DDEELLELVE MEVRELLSQY DFPGDDTPIV

151 RGSALK**ALEG** **DAEWEA**KILE LAGFLDSVIP EPERAIDKPF LLPIEDVFISI

201 SGRGTVVTGR VERGIHKVGE EVEIVGIKET QK**STCTGVEM** **FRKLLDEGRA**

251 **GENVGVLLRG** IKREEIERGQ VLAKPGTIKP HTKFESEVYI LSKDEGGRHT

301 PFFK**GYRQPF** **YFR**TTDVTGT IELPEGVEMV MPGDNIKMVV TLIHPIAMDD

351 GLRFAIREGG **RTVGAGV**VAK VLG

Unformatted sequence string: **373 residues** (for pasting into other applications).

Sort peptides by

☒ Residue Number

☐ Increasing Mass

☐ Decreasing Mass

Show predicted peptides also

| Query              | Start - End | Observed | Mr (expt) | Mr (calc) | Delta M | Score | Expect | Rank     | U | Peptide                         |
|--------------------|-------------|----------|-----------|-----------|---------|-------|--------|----------|---|---------------------------------|
| <a href="#">44</a> | 25 - 36     | 689.1300 | 1376.2454 | 1375.6255 | 0.6199  | 0     | 23     | 20       | 1 | R.AFDQIDNAPEEK.A                |
| <a href="#">46</a> | 25 - 38     | 535.5000 | 1603.4782 | 1602.7638 | 0.7144  | 1     | 18     | 62       | 1 | R.AFDQIDNAPEEKAR.G              |
| <a href="#">37</a> | 157 - 167   | 610.0500 | 1218.0854 | 1217.5564 | 0.5291  | 0     | 55     | 0.014    | 1 | U K.ALEGDAEWEAK.I               |
| <a href="#">43</a> | 233 - 243   | 666.5900 | 1331.1654 | 1330.6010 | 0.5645  | 1     | 15     | 1.2e+002 | 2 | K.STCTGVEMFRK.L + Oxidation (M) |
| <a href="#">21</a> | 243 - 249   | 415.9400 | 829.8654  | 829.4657  | 0.3997  | 1     | 40     | 0.58     | 1 | R.KLLDEGR.A                     |
| <a href="#">30</a> | 250 - 259   | 514.5400 | 1027.0654 | 1026.5822 | 0.4833  | 0     | 62     | 0.0027   | 1 | R.AGENVGVLLR.G                  |
| <a href="#">40</a> | 305 - 313   | 412.0700 | 1233.1882 | 1232.6091 | 0.5791  | 0     | 19     | 60       | 2 | K.GYRQPFYFR.T                   |
| <a href="#">19</a> | 362 - 370   | 401.4300 | 800.8454  | 800.4756  | 0.3698  | 0     | 43     | 0.23     | 1 | R.TVGAGVVAK.V                   |





LOCUS WP\_000001277 373 aa linear BCT 14-MAY-2013

DEFINITION elongation factor Tu, partial [Escherichia coli].

ACCESSION WP\_000001277

VERSION WP\_000001277.1

KEYWORDS RefSeq.

SOURCE Escherichia coli

ORGANISM Escherichia coli

Bacteria; Proteobacteria; Gammaproteobacteria; Enterobacteriales; Enterobacteriaceae; Escherichia.

COMMENT REFSEQ: This record represents a single, non-redundant, protein sequence which may be annotated on many different RefSeq genomes from the same, or different, species.

COMPLETENESS: incomplete on the amino end.

FEATURES

source 1..373

/organism="Escherichia coli"

/db\_xref="taxon:562"

Protein 1..373

/product="elongation factor Tu"

/calculated\_mol\_wt=40907

Region 1..372

/region\_name="PRK00049"

/note="elongation factor Tu; Reviewed"

/db\_xref="CDD:234596"

Region 1..182

/region\_name="EF\_Tu"

/note="Elongation Factor Tu (EF-Tu) GTP-binding proteins; cd01884"

Site

order(1,5..6,9,12..13,17,45..46,64..65,88..89,91..94,97,128,132,158..159)

/site\_type="other"

/note="GEF interaction site [polypeptide binding]"

/db\_xref="CDD:206671"

Site

order(1..6,26,115..116,118,153..155)

/site\_type="other"

/note="GTP/Mg2+ binding site [chemical binding]"

/db\_xref="CDD:206671"

Site 35..45

/site\_type="other"

/note="Switch I region"

/db\_xref="CDD:206671"

Site 41

/site\_type="other"

/note="G2 box"

/db\_xref="CDD:206671"

Site 60..63

/site\_type="other"

/note="G3 box"

/db\_xref="CDD:206671"

Site 62..80

/site\_type="other"

/note="Switch II region"

/db\_xref="CDD:206671"

Site 115..118

/site\_type="other"

/note="G4 box"

/db\_xref="CDD:206671"

Site 153..155

/site\_type="other"

/note="G5 box"

/db\_xref="CDD:206671"

http://mascot/mascot/cgi/protein\_view.pl?file=.%2Fdata%2F20180206%2FF004374.dat&hit=gi%7C445923422&db\_idx=1&px=1&ave\_thresh=49&... 1/2
