# Supplementary material for: Metal complexation by histidine-rich peptides confers protective roles against cadmium stress in Escherichia coli as revealed by proteomics analysis
Source: PeerJ journal article supplement (doi:10.7717/peerj.5245), 2018-07-26
Supplement: Supplementary.zip [file Supplementary.zip]



MASCOT Search Results

Protein View: gi|166079760

outer membrane protein C [Escherichia coli]

Database: NCBI

Score: 185

Nominal mass (M<sub>r</sub>): 40275

Calculated pI: 4.50

Taxonomy: [Escherichia coli](#)

This protein sequence matches the following other entries:

- [gi|241110589](#) from [Escherichia coli](#)

Sequence similarity is available as [an NCBI BLAST search of gi|166079760 against nr](#).

Search parameters

MS data file: C1.mgf

Enzyme: Trypsin: cuts C-term side of KR unless next residue is P.

Fixed modifications: [Carbamidomethyl \(C\)](#)

Variable modifications: [Oxidation \(M\)](#)

Protein sequence coverage: 14%

Matched peptides shown in **bold red**.

1 MKVKVLSLLV PALLVAGAAN AAEIYNKDG N KLDLYGKVDG LHYFSDNDSK

51 DGDKTYMRLG FRGETQVTDD LTGYGQWEYQ IQGNEPESDN SSWTR**VAFAG**

101 **LKFQDVGSFD YGR**NYGVVYD VTSWTDVLE FGGDTYDSN FMQQR**GNGFA**

151 **TYR**NTDFFGL VDGLDFAVQY QGKNGSAHG GMTTNGRDDV FRQNGDGVGG

201 SITINYEGFG IGAAVSSSKR TWDQNNGLI GTGDR**AEITYT GGLK**YDANNI

251 YLAAQYTQTY NATRVGSLGW ANKAQNFEAV AQYQDFGLR PSLAYLQSKG

301 KNLGR**GYDDE DILK**YVDVGA TTYFN**KNMT YVDYK**TNLLD DNRFRDAGI

351 NTDDIVALGL VYQF

Unformatted sequence string: **364 residues** (for pasting into other applications).

Sort peptides by

☒ Residue Number

☐ Increasing Mass

☐ Decreasing Mass

Show predicted peptides also

| Query              | Start - End | Observed | Mr (expt) | Mr (calc) | Delta  | M Score | Expect   | Rank | U | Peptide                       |
|--------------------|-------------|----------|-----------|-----------|--------|---------|----------|------|---|-------------------------------|
| <a href="#">16</a> | 96 - 102    | 353.3600 | 704.7054  | 704.4221  | 0.2833 | 0 24    | 2.4      | 1    | 1 | R.VAFAGLK.F                   |
| <a href="#">41</a> | 103 - 113   | 646.0900 | 1290.1654 | 1289.5677 | 0.5978 | 0 41    | 0.39     | 1    | 1 | K.FQDVGSFDYGR.N               |
| <a href="#">29</a> | 146 - 153   | 443.3900 | 884.7654  | 884.4141  | 0.3514 | 0 15    | 1.4e+002 | 2    | 1 | R.GNGFATYR.N                  |
| <a href="#">21</a> | 236 - 244   | 470.4400 | 938.8654  | 938.4709  | 0.3945 | 0 31    | 3.4      | 1    | 1 | R.AETITGGLK.Y                 |
| <a href="#">36</a> | 306 - 314   | 534.4700 | 1066.9254 | 1066.4819 | 0.4436 | 0 53    | 0.016    | 1    | U | R.GYDDEDLK.Y                  |
| <a href="#">27</a> | 327 - 335   | 560.9900 | 1119.9654 | 1119.4906 | 0.4748 | 0 21    | 33       | 1    | 1 | K.NMSTYVDYK.T                 |
| <a href="#">39</a> | 327 - 335   | 568.9800 | 1135.9454 | 1135.4856 | 0.4599 | 0 13    | 2.2e+002 | 2    | 2 | K.NMSTYVDYK.T + Oxidation (M) |



RMS error 418 ppm

RMS error 418 ppm

LOCUS ABY81617 364 aa linear BCT 21-APR-2008

DEFINITION outer membrane protein C [Escherichia coli].

ACCESSION ABY81617

VERSION ABY81617.1

DBSOURCE accession EU372011.1

KEYWORDS .

SOURCE Escherichia coli

ORGANISM Escherichia coli

Bacteria; Proteobacteria; Gammaproteobacteria; Enterobacteriales; Enterobacteriaceae; Escherichia.

REFERENCE 1 (residues 1 to 364)

AUTHORS Liu,Y.F., Yan,J.J., Ko,W.C., Tsai,S.H. and Wu,J.J.

TITLE Characterization of carbapenem-non-susceptible Escherichia coli isolates from a university hospital in Taiwan

JOURNAL J. Antimicrob. Chemother. 61 (5), 1020-1023 (2008)

PUBMED 18292097

REFERENCE 2 (residues 1 to 364)

AUTHORS Liu,Y.-F., Yan,J.-J. and Wu,J.-J.

TITLE Direct Submission

JOURNAL Submitted (02-JAN-2008) Institute of Basic Medical Sciences, College of Medicine, National Cheng-Kung University, 1st, University Road, Tainan, Taiwan

FEATURES

source

1..364

/organism="Escherichia coli"

/isolate="05-983"

/db\_xref="taxon:562"

/country="Taiwan: Cheng-Kung University Hospital"

/note="multi-drug resistant"

Protein

1..364

/product="outer membrane protein C"

Region

12..342

/region\_name="Porin\_4"

/note="Gram-negative porin; pfam13609"

/db\_xref="CDD:290340"

Region

14..364

/region\_name="PRK10554"

/note="Outer membrane porin protein C; Provisional"

/db\_xref="CDD:182543"

Site

order(30,32,38,40,42,63,67,73,75,77,79,81,84,94,95,97,101,111,113,145,147,148,324,325,328,360,362,364)

/site\_type="other"

/note="trimer interface [polypeptide binding]"

/db\_xref="CDD:238208"

Site

order(37,58,95,126,145)

/site\_type="other"

/note="eyelet of channel"

/db\_xref="CDD:238208"

CDS

1..364

/gene="ompC"

/coded\_by="EU372011.1:1..1095"

/note="OmpC"

/transl\_table=11

Mascot: <http://www.matrixscience.com/>
