# Supplementary material for: Metal complexation by histidine-rich peptides confers protective roles against cadmium stress in Escherichia coli as revealed by proteomics analysis
Source: PeerJ journal article supplement (doi:10.7717/peerj.5245), 2018-07-26
Supplement: Supplementary.zip [file Supplementary.zip]



MASCOT Search Results

Protein View: gi|446651772

molecular chaperone GroEL [Escherichia coli]

Database: NCBI

Score: 377

Nominal mass (M<sub>r</sub>): 57492

Calculated pI: 4.85

Taxonomy: [Escherichia coli](#)

Sequence similarity is available as [an NCBI BLAST search of gi|446651772 against nr](#).

Search parameters

MS data file: 5-2.mgf

Enzyme: Trypsin: cuts C-term side of KR unless next residue is P.

Fixed modifications: [Carbamidomethyl \(C\)](#)

Variable modifications: [Oxidation \(M\)](#)

Protein sequence coverage: 17%

Matched peptides shown in **bold red**.

1 MAAKDVKFGN DARVKMLR**GV NVLADAVKVT** LGPKGRNVVL DKSFGAPTIT

51 **KDGVSVAREI** ELEDKFENMG AQMVKEVASK ANDAAGDGT TATVLAQAI

101 TEGLKAVAAG MNFMDLKRGI DRAVTAAVEE **LKALSVPCSD SKAIAQVGTI**

151 SANSDETGVK LIAEAMDRVG KEGVITVEDG TGLQDELDVV EGMQFDRGYL

201 SPYFINKPET GAVELESPFI LLADKKISNI **REMLPVL**EAV **AKAGKPLLI**

251 AEDVEGEALA TLVNTMRGI VKVAAV**KAPG FGDR**RRKAMLQ DIATLTGGTV

301 ISEEIGMELE **KATLEDLQGA** KRVVINKDIT TIIDGVGEEV AIQGRVAQIR

351 QQIEEATSDY DREKLQERVA **KLAGGVAVIK** VGAATEVEMK EKKAR**VEDAL**

401 **HATRAA**VEEG VVAGGGVALI RVASK**LADLR GQ**NEDQNVGI **KVALRAMEAP**

451 **LRQIV**LNCGE EPSVVANTVK GGDGNYGNA ATEEYGNMID MGILDPTKVT

501 RSALQYAASV AGIMITTECM VTDLPRNDAA DLGAAGMGGM MGGMGGM

Unformatted sequence string: **548 residues** (for pasting into other applications).

Sort peptides by

☒ Residue Number

☐ Increasing Mass

☐ Decreasing Mass

Show predicted peptides also

| Query              | Start - End | Observed | Mr (expt) | Mr (calc) | Delta  | M | Score | Expect   | Rank | U | Peptide                         |
|--------------------|-------------|----------|-----------|-----------|--------|---|-------|----------|------|---|---------------------------------|
| <a href="#">23</a> | 19 - 28     | 493.5200 | 985.0254  | 984.5604  | 0.4651 | 0 | 79    | 6e-005   | 1    | U | R.GVNVLADAVK.V                  |
| <a href="#">17</a> | 52 - 58     | 352.3700 | 702.7254  | 702.3661  | 0.3594 | 0 | 22    | 7.5      | 4    | U | K.DGVSVAR.E                     |
| <a href="#">38</a> | 133 - 142   | 532.5000 | 1062.9854 | 1062.5016 | 0.4839 | 0 | 13    | 1.9e+002 | 1    | U | K.ALSVPCSDSK.A                  |
| <a href="#">42</a> | 232 - 242   | 608.5900 | 1215.1654 | 1214.6580 | 0.5074 | 0 | 18    | 67       | 2    | U | R.EMLPVLEAVAK.A + Oxidation (M) |
| <a href="#">20</a> | 278 - 284   | 360.3400 | 718.6654  | 718.3398  | 0.3256 | 0 | 30    | 0.93     | 1    | U | K.APGFGDR.R                     |
| <a href="#">37</a> | 312 - 321   | 523.5300 | 1045.0454 | 1044.5451 | 0.5003 | 0 | 23    | 30       | 1    | U | K.ATLEDLGQAK.R                  |
| <a href="#">41</a> | 312 - 322   | 401.4200 | 1201.2382 | 1200.6462 | 0.5919 | 1 | 17    | 79       | 3    | U | K.ATLEDLGQAKR.V                 |
| <a href="#">24</a> | 372 - 380   | 414.4700 | 826.9254  | 826.5276  | 0.3978 | 0 | 55    | 0.012    | 1    | U | K.LAGGVAVIK.V                   |
| <a href="#">35</a> | 396 - 404   | 506.5000 | 1010.9854 | 1010.5145 | 0.4710 | 0 | 54    | 0.018    | 1    | U | R.VEDALHATR.A                   |
| <a href="#">11</a> | 426 - 441   | 590.9100 | 1769.7082 | 1768.9068 | 0.8014 | 1 | 18    | 1.4e+002 | 2    | U | K.LADLRGQNEQNVGIK.V             |
| <a href="#">40</a> | 431 - 441   | 601.5500 | 1201.0854 | 1200.5735 | 0.5120 | 0 | 38    | 0.65     | 1    | U | R.GQNEQNVGIK.V                  |
| <a href="#">23</a> | 446 - 452   | 402.4100 | 802.8054  | 802.4007  | 0.4048 | 0 | 16    | 1.1e+002 | 1    | U | R.AMEAPLR.Q + Oxidation (M)     |





LOCUS WP\_000729118 548 aa linear BCT 22-JUL-2017

DEFINITION chaperonin GroEL [Escherichia coli].

ACCESSION WP\_000729118

VERSION WP\_000729118.1

KEYWORDS RefSeq.

SOURCE Escherichia coli

ORGANISM Escherichia coli

Bacteria; Proteobacteria; Gammaproteobacteria; Enterobacterales; Enterobacteriaceae; Escherichia.

COMMENT REFSEQ: This record represents a single, non-redundant, protein sequence which may be annotated on many different RefSeq genomes from the same, or different, species.

COMPLETENESS: full length.

FEATURES Location/Qualifiers

source 1..548

protein 1..548

region 2..530

site order(4,8,25,36..39,41,46..47,49,59,61,69,73,76,197,229,257,384,386,459,513,516..522)

site order(31..33,87,91,150,398,415,454,493,495)

site order(109,434,452,461,463..464,467)

site order(141,186,193,375,409..410)

Mascot: <http://www.matrixscience.com/>
