# Supplementary material for: Metal complexation by histidine-rich peptides confers protective roles against cadmium stress in Escherichia coli as revealed by proteomics analysis
Source: PeerJ journal article supplement (doi:10.7717/peerj.5245), 2018-07-26
Supplement: Supplementary.zip [file Supplementary.zip]



MASCOT Search Results

Protein View: gi|41936

tryptophanase [Escherichia coli]

Database: NCBI

Score: 298

Nominal mass (M<sub>r</sub>): 53098

Calculated pI: 5.88

Taxonomy: [Escherichia coli](#)

This protein sequence matches the following other entries:

- [gi|147997](#) from [Escherichia coli](#)

Sequence similarity is available as [an NCBI BLAST search of gi|41936 against nr](#).

Search parameters

MS data file: P.mgf

Enzyme: Trypsin: cuts C-term side of KR unless next residue is P.

Fixed modifications: [Carbamidomethyl \(C\)](#)

Variable modifications: [Oxidation \(M\)](#)

Protein sequence coverage: 14%

Matched peptides shown in **bold red**.

1 MENFKHLPEP FRIR**VIEPVK** RTTRAYREEA IIKSGMNPFL LQSEDFVIDL

51 LTDSGTGAVT QSMQAAMMRG DEAYSGSR**SY YALAESVK**NI FGQYTIPTH

101 QGRGAEQIYI PVLIKKREQE KGLDRSKMVA FSNYFFDTTQ GHSQINGCTV

151 RNVVIKE**AFD T**GVRYDFK**GN F**DLEGLERGI EVGPNNVVPY IVATITSNSA

201 GGQFPVSLANL **K**AMYSIA**K**KY DIPVMDSAR **F**AE**N**AV**F**IKQ REAEYKDWTI

251 EQITRETYKY **A**D**M**L**A**MSAKK DAMVPMGGLL CMKDDSFDDV YTECRSLCVV

301 GGQFPYTGGL EGGAMERLAV GLYDGMNLWD LAYRIAQVQY LVDGLEEIGV

351 VCQQAAGHAA FVDAGKLLPH IPADQFPATG LACELYKVAG IRAVEIGSFL

401 LGRDPKTKGQ LPCPAELLRL TIPRATYQTG HMDFIIEAFK HVKENAANIK

451 **GLTFTTYEPK**V LRHFTAKLKE V

Unformatted sequence string: **471 residues** (for pasting into other applications).

Sort peptides by ☒ Residue Number ☐ Increasing Mass ☐ Decreasing Mass

Show predicted peptides also

| Query              | Start - End | Observed | Mr (expt) | Mr (calc) | Delta  | M | Score | Expect   | Rank | U  | Peptide                          |
|--------------------|-------------|----------|-----------|-----------|--------|---|-------|----------|------|----|----------------------------------|
| <a href="#">24</a> | 15 - 21     | 420.9400 | 839.8654  | 839.5229  | 0.3426 | 1 | 30    | 3.3      | 3    | .. | R.VIEPVKR.T                      |
| <a href="#">36</a> | 79 - 88     | 566.0200 | 1130.0254 | 1129.5655 | 0.4599 | 0 | 64    | 0.0016   | 1    | 1  | R.SYYALAESVK.N                   |
| <a href="#">32</a> | 157 - 164   | 447.9200 | 893.8254  | 893.4243  | 0.4011 | 0 | 22    | 27       | 2    | 2  | K.EAFDTGVR.Y                     |
| <a href="#">39</a> | 169 - 178   | 575.5200 | 1149.0254 | 1148.5462 | 0.4793 | 0 | 65    | 0.0014   | 1    | 1  | K.GNFDLEGLER.G                   |
| <a href="#">21</a> | 212 - 218   | 400.3800 | 798.7454  | 798.3945  | 0.3509 | 0 | 35    | 1        | 1    | 1  | K.AMYSIAK.K + Oxidation (M)      |
| <a href="#">35</a> | 231 - 239   | 552.0100 | 1102.0054 | 1101.5495 | 0.4560 | 0 | 27    | 8.4      | 1    | 1  | R.FAENAVFIK.Q                    |
| <a href="#">37</a> | 260 - 269   | 567.0000 | 1131.9854 | 1131.4940 | 0.4914 | 0 | 42    | 0.28     | 1    | U  | K.YADMLAMSAK.K + 2 Oxidation (M) |
| <a href="#">34</a> | 451 - 459   | 528.5000 | 1054.9854 | 1054.5335 | 0.4519 | 0 | 15    | 1.3e+002 | 1    | 1  | K.GLTFTTYEPK.V                   |





LOCUS CAA34096 471 aa linear BCT 18-APR-2005

DEFINITION tryptophanase [Escherichia coli].

ACCESSION CAA34096

VERSION CAA34096.1

DBSOURCE embl accession X15974.1

KEYWORDS .

SOURCE Escherichia coli

ORGANISM Escherichia coli

Bacteria; Proteobacteria; Gammaproteobacteria; Enterobacterales; Enterobacteriaceae; Escherichia.

REFERENCE 1 (residues 1 to 471)

AUTHORS Tokushige,M., Tsujimoto,N., Oda,T., Honda,T., Yumoto,N., Ito,S., Yamamoto,M., Kim,E.H. and Hiragi,Y.

TITLE Role of cysteine residues in tryptophanase for monovalent cation-induced activation

JOURNAL Biochimie 71 (6), 711-720 (1989)

PUBMED 2502187

FEATURES

source

1..471

/organism="Escherichia coli"

/strain="B/1t7-A"

/db\_xref="taxon:562"

Protein

1..471

/product="tryptophanase"

/EC\_number="4.1.99.1"

Region

1..471

/region\_name="TnaA"

/note="Tryptophanase [Amino acid transport and metabolism]; COG3033"

/db\_xref="CDD:225576"

Region

5..471

/region\_name="tnaA\_trp\_ase"

/note="Tryptophanase, leader peptide-associated; TIGR02617"

/db\_xref="CDD:131666"

Site

order(102..103,106,194,227,230,267,270)

/site\_type="other"

/note="pyridoxal 5'-phosphate binding pocket [chemical binding]"

/db\_xref="CDD:99742"

Site

270

/site\_type="active"

/note="catalytic residue [active]"

/db\_xref="CDD:99742"

CDS

1..471

/coded\_by="X15974.1:1..1416"

/transl\_table=11

/db\_xref="GOA:POA853"

/db\_xref="InterPro:IPR001597"

/db\_xref="InterPro:IPR011166"

/db\_xref="InterPro:IPR013440"

/db\_xref="InterPro:IPR015421"

/db\_xref="InterPro:IPR015422"

/db\_xref="InterPro:IPR015424"

/db\_xref="InterPro:IPR018176"

/db\_xref="PDB:2C44"

/db\_xref="PDB:2QXQ"

/db\_xref="PDB:2V0Y"

http://mascot/mascot/cgi/protein\_view.pl?file=.%2Fdata%2F20180213%2FF004453.dat&hit=gi%7C41936&db\_idx=1&px=1&ave\_thresh=50&ign... 1/2
