# Supplementary material for: Metal complexation by histidine-rich peptides confers protective roles against cadmium stress in Escherichia coli as revealed by proteomics analysis
Source: PeerJ journal article supplement (doi:10.7717/peerj.5245), 2018-07-26
Supplement: Supplementary.zip [file Supplementary.zip]

MATRIX  
SCIENCE

MASCOT Search Results

Protein View: gi|446058921

glycerol kinase [Escherichia coli]

Database: NCBInr

Score: 524

Nominal mass (M<sub>r</sub>): 56496

Calculated pI: 5.36

Taxonomy: [Escherichia coli](#)

This protein sequence matches the following other entries:

• [gi|323153997](#) from [Escherichia coli EPECa14](#)

Sequence similarity is available as [an NCBI BLAST search of gi|446058921 against nr](#).

Search parameters

MS data file: 7-1.mgf

Enzyme: Trypsin: cuts C-term side of KR unless next residue is P.

Fixed modifications: [Carbamidomethyl \(C\)](#)

Variable modifications: [Oxidation \(M\)](#)

Protein sequence coverage: 26%

Matched peptides shown in **bold red**.

1 MTEKKYIVAL DQGTSSRAV VMDHDANIIS VSQR**EFEQIY** PKLGWVEHDP

51 MEIWTQSST LVEVLAKADI SSDQIAAIGI TNQR**ETTIWV** EKETGKPIYN

101 AIVWQCRRTA EICEHLKR**DG LEDYIR**SNLTG LVDPYFSGT KVK**WILDHVE**

151 **GSRE**RARRGE LLFGTVDTWL IWKMTQGR**VH VTDYTNASR**T MLFNIHTLDW

201 DDK**MLEVLDI** **PREMLPEVR**R **SSEVYGQ**TNI GKGKGTIRPI SGIAGDQQAA

251 LFGQLCVKEG MAKNTYGTGC FMLMNTGEKA VKSENGLLTT IACGPTGEVN

301 YALEGAVFMA GASIQWLRDE MKLINDAYDS EYFATKVQNT NGVYVVPAPT

351 GLGAPYWDPY ARG**AI****FGLTR** GVNANHII**RA TLESIA**YQTR DVLEAMQ**ADS**

401 **GIRL**HALRVD GGAVANNFLM QFQSDILGTR **VERPEV**REVT ALGAAYLAGL

451 AVGFQWNLDE LQEKAVIERE **FRPGIETTER** NYRYAGWKKA VKR**AMAWEEH**

501 **DE**

Unformatted sequence string: **502 residues** (for pasting into other applications).

Sort peptides by ☒ Residue Number ☐ Increasing Mass ☐ Decreasing Mass

Show predicted peptides also

| Query              | Start - End | Observed | Mr (expt) | Mr (calc) | Delta M | Score | Expect | Rank     | U | Peptide                           |
|--------------------|-------------|----------|-----------|-----------|---------|-------|--------|----------|---|-----------------------------------|
| <a href="#">43</a> | 35 - 42     | 527.5000 | 1052.9854 | 1052.5178 | 0.4676  | 0     | 16     | 1.8e+002 | 4 | U R.EFEQIYPK.L                    |
| <a href="#">39</a> | 85 - 92     | 503.4800 | 1004.9454 | 1004.5179 | 0.4276  | 0     | 39     | 1.3      | 1 | R.ETTIVWEK.E                      |
| <a href="#">37</a> | 119 - 126   | 490.9600 | 979.9054  | 979.4611  | 0.4444  | 0     | 46     | 0.2      | 1 | R.DGLDYIR.S                       |
| <a href="#">49</a> | 144 - 153   | 606.5600 | 1211.1054 | 1210.6095 | 0.4960  | 0     | 36     | 2.1      | 1 | K.WILDHVEGSR.E                    |
| <a href="#">53</a> | 179 - 189   | 632.0800 | 1262.1454 | 1261.6051 | 0.5403  | 0     | 46     | 0.23     | 1 | R.VHVTDTYNASR.T                   |
| <a href="#">47</a> | 204 - 212   | 551.5600 | 1101.1054 | 1100.5900 | 0.5155  | 0     | 65     | 0.0026   | 1 | K.MLEVLDIRP.E + Oxidation (M)     |
| <a href="#">24</a> | 213 - 219   | 445.4300 | 888.8454  | 888.4375  | 0.4080  | 0     | 23     | 43       | 1 | R.EMLPEVR.R + Oxidation (M)       |
| <a href="#">57</a> | 221 - 233   | 670.6100 | 1339.2054 | 1338.6416 | 0.5639  | 0     | 45     | 0.22     | 1 | R.SSEVYGQTNIGGK.G                 |
| <a href="#">58</a> | 221 - 233   | 447.4100 | 1339.2082 | 1338.6416 | 0.5666  | 0     | 21     | 55       | 1 | R.SSEVYGQTNIGGK.G                 |
| <a href="#">26</a> | 363 - 370   | 417.9500 | 833.8854  | 833.4759  | 0.4095  | 0     | 57     | 0.017    | 1 | R.GAIFGLTR.G                      |
| <a href="#">50</a> | 380 - 390   | 627.1100 | 1252.2054 | 1251.6459 | 0.5596  | 0     | 29     | 9.8      | 1 | R.ATLESIAVQTR.D                   |
| <a href="#">52</a> | 391 - 403   | 711.1400 | 1420.2654 | 1419.6664 | 0.5991  | 0     | 45     | 0.24     | 1 | R.DVLEAMQADSGIR.L + Oxidation (M) |
| <a href="#">33</a> | 431 - 437   | 442.9600 | 883.9054  | 883.4875  | 0.4179  | 0     | 22     | 45       | 2 | R.VERPEVR.E                       |
| <a href="#">56</a> | 470 - 480   | 445.7600 | 1334.2582 | 1333.6626 | 0.5956  | 0     | 17     | 1.3e+002 | 4 | R.EFRPGIETTER.N                   |
| <a href="#">48</a> | 494 - 502   | 567.4700 | 1132.9254 | 1132.4131 | 0.5123  | 0     | 41     | 0.56     | 1 | R.AMAWEEHDE.- + Oxidation (M)     |

LOCUS WP\_000136776 502 aa linear BCT 14-MAY-2013

DEFINITION glycerol kinase [Escherichia coli].

ACCESSION WP\_000136776

VERSION WP\_000136776.1

KEYWORDS RefSeq.

SOURCE Escherichia coli

ORGANISM Escherichia coli

Bacteria; Proteobacteria; Gammaproteobacteria; Enterobacterales; Enterobacteriaceae; Escherichia.

COMMENT REFSEQ: This record represents a single, non-redundant, protein sequence which may be annotated on many different RefSeq genomes from the same, or different, species.  
COMPLETENESS: full length.

FEATURES

Location/Qualifiers

source1..502/organism="Escherichia coli"/db\_xref="taxon:562"

Protein1..502/product="glycerol kinase"/calculated\_mol\_wt=56116

Region1..498/region\_name="glpK"/note="glycerol kinase; Provisional; PRK00047"/db\_xref="CDD:234594"

Mascot: <http://www.matrixscience.com/>

http://mascot/mascot/cgi/protein\_view.pl?file=..%2Fdata%2F20180206%2FF004362.dat&hit=gi%7C446058921&db\_idx=1&px=1&ave\_thresh=51&... 1/1
