# Supplementary material for: Metal complexation by histidine-rich peptides confers protective roles against cadmium stress in Escherichia coli as revealed by proteomics analysis
Source: PeerJ journal article supplement (doi:10.7717/peerj.5245), 2018-07-26
Supplement: Supplementary.zip [file Supplementary.zip]

Protein View: [gi|26106455](#)

**Aconitate hydratase 2 [Escherichia coli CFT073]**

**Database:** NCBIInr  
**Score:** 50  
**Nominal mass (M<sub>r</sub>):** 100033  
**Calculated pI:** 5.78  
**Taxonomy:** Escherichia coli

This protein sequence matches the following other entries:

- [gi|191070760](#) from **Escherichia coli UTI89**
- [gi|115511529](#) from **Escherichia coli APEC O1**
- [gi|190905486](#) from **Escherichia coli F11**
- [gi|226902186](#) from **Escherichia sp. 3\_2\_53FAA**
- [gi|355418535](#) from **Escherichia coli str. 'clone D i2'**
- [gi|355423455](#) from **Escherichia coli str. 'clone D i14'**
- [gi|641682693](#) from **Escherichia coli ST131**

Sequence similarity is available as [an NCBI BLAST search of qi|26106455 against nr.](#)

### Search parameters

**MS data file:** 1-2.mgf  
**Enzyme:** Trypsin: cuts C-term side of KR unless next residue is P.  
**Fixed modifications:** Carbamidomethyl (C)  
**Variable modifications:** Oxidation (M)

**Protein sequence coverage: 2%**

Matched peptides shown in **bold red**.

|     |                        |                        |             |                     |                        |
|-----|------------------------|------------------------|-------------|---------------------|------------------------|
| 1   | MLFLCKQJINT            | SKSKCSYASC             | GTGHLEPYKLL | SHRSVKRPA           | RTMTMRARRL             |
| 51  | VLEEYERKGVH            | AERAEAGTAP             | KPLDANQKAA  | LVELLNKPAA          | GEFEFLFLLD             |
| 101 | TRNRVPKGVH             | AAYYKAGFLA             | AVANQMAASP  | LTLPKEALIE          | LGTMQGGYNI             |
| 151 | HLFLDALDIA             | KLAPIAAKAL             | SHVLLMDFNF  | YDVPEAKKAG          | NEYAKVQKMS             |
| 201 | WADAEAFNLR             | PALAEKLFNR             | FHTLVKGTENT | LDLSPADPAM          | SRPDJPLHALS            |
| 251 | AMLKNAEAGI             | EDPDQGVGVP             | IKQICLAEQO  | GFFPLAYGVD          | VGTGSSRKSA             |
| 301 | TSNVLVFMFG             | DIPHVNKVRP             | GLKGLGKITA  | PIFNFTMDIA          | GALPVEEIVD             |
| 351 | NLMDGVDIV              | YPYKVEVRNF             | ETGELLEATF  | LKTFDLIDEV          | RAGGER <del>PLII</del> |
| 401 | <del>GRGLT</del> KDARE | ALVGSFSDNF             | RQAKDVAESD  | RKGFSLAQKM          | GRACGVKQIR             |
| 451 | PAYCEPKMT              | SVGQSDDTGP             | TRMDREKLDA  | CLGSLADLDA          | QSFCHTAAGP             |
| 501 | KPVDVNTHTH             | LTDFIMNRGG             | VSRLRGDGVFI | HSWNLNRNFI          | DMVTGTDGSHS            |
| 551 | TRFFIGISFV             | AGSLVAFAA              | ATPGPMVSL   | ESLVIRFFKG          | PDQTGTLRSD             |
| 601 | VHAIPLAYLA             | GLTKVTEKK              | KNNISFGRIL  | ETIEGLPDYK          | EQEAFDTLAS             |
| 651 | AERSAAGCTI             | KLNKEPIETI             | KLNIISVLLK  | MAIEAGLVR           | TLLRITQGBE             |
| 701 | KWANPELLE              | ADADAEEYAA             | IDIDLADIKE  | PILCAANDRD          | DARPLSAVQGD            |
| 751 | EKIDIEVIGS             | CGMNI <del>G</del> HFA | AGKLMDAHKG  | GLPTLRWPAV          | PTMRDAQLGT             |
| 801 | EEGYYSVFGK             | SATRIEIPGC             | SLCMGNQAGV  | <del>ADGATVTS</del> | <del>TRNFN</del> NRNLT |
| 851 | GANVFLASAE             | LAALVAALIG             | LTPEETEEQY  | VAQVDKTAVD          | TRYRLNFDQL             |
| 901 | SOYTEKADGV             | IFOTAV                 |             |                     |                        |

Unformatted sequence string: **916 residues** (for pasting into other applications).

Sort peptides by ☒ Residue Number ☐ Increasing Mass ☐ Decreasing Mass

☐ Show predicted peptides also

| Query              | Start - End | Observed | Mr(expt)  | Mr(calc)  | Delta M | Score | Expect | Rank | U        | Peptide            |
|--------------------|-------------|----------|-----------|-----------|---------|-------|--------|------|----------|--------------------|
| <a href="#">32</a> | 396 - 402   | 391.4700 | 780.9254  | 780.5221  | 0.4033  | 0     | 12     | 90   | <u>1</u> | U R.IPLIIGR.G      |
| <a href="#">42</a> | 830 - 842   | 632.5900 | 1263.1654 | 1262.6467 | 0.5188  | 0     | 38     | 0.72 | <u>1</u> | U R.VADGATVSVSTR.N |

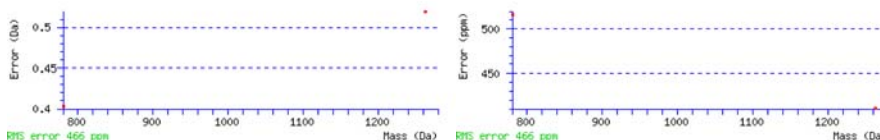

|            |                                                                                                                                                                                                                                                        |        |        |                 |
|------------|--------------------------------------------------------------------------------------------------------------------------------------------------------------------------------------------------------------------------------------------------------|--------|--------|-----------------|
| LOCUS      | AE016751.141                                                                                                                                                                                                                                           | 916 aa | linear | BCT 31-JAN-2014 |
| DEFINITION | Aconitate hydratase 2 [Escherichia coli CFT073].                                                                                                                                                                                                       |        |        |                 |
| ACCESSION  | AA078641                                                                                                                                                                                                                                               |        |        |                 |
| VERSION    | AA078641.1                                                                                                                                                                                                                                             |        |        |                 |
| DBLINK     | BioProject: PRJNA313                                                                                                                                                                                                                                   |        |        |                 |
|            | BioSample: SAMN02604094                                                                                                                                                                                                                                |        |        |                 |
| DBSOURCE   | accession AE014075.1                                                                                                                                                                                                                                   |        |        |                 |
| KEYWORDS   | .                                                                                                                                                                                                                                                      |        |        |                 |
| SOURCE     | Escherichia coli CFT073                                                                                                                                                                                                                                |        |        |                 |
| ORGANISM   | Escherichia coli CFT073                                                                                                                                                                                                                                |        |        |                 |
|            | Bacteria; Proteobacteria; Gammaproteobacteria; Enterobacterales; Enterobacteriaceae; Escherichia.                                                                                                                                                      |        |        |                 |
| REFERENCE  | 1 (residues 1 to 916)                                                                                                                                                                                                                                  |        |        |                 |
| AUTHORS    | Welch,R.A., Burland,V., Plunkett,G. III, Redford,P., Roesch,P., Rasko,D., Buckles,E.L., Liou,S.R., Boutin,A., Hackett,J., Stroud,D., Mayhew,G.F., Rose,D.J., Zhou,S., Schwartz,D.C., Perna,N.T., Mobley,H.L., Donnenberg,M.S. and Blattner,F.R.        |        |        |                 |
| TITLE      | Extensive mosaic structure revealed by the complete genome sequence of uropathogenic Escherichia coli                                                                                                                                                  |        |        |                 |
| JOURNAL    | Proc. Natl. Acad. Sci. U.S.A. 99 (26), 17020-17024 (2002)                                                                                                                                                                                              |        |        |                 |
| PUBMED     | 12471157                                                                                                                                                                                                                                               |        |        |                 |
| REFERENCE  | 2 (residues 1 to 916)                                                                                                                                                                                                                                  |        |        |                 |
| AUTHORS    | Welch,R.A., Burland,V., Plunkett,G.D. III, Redford,P., Roesch,P., Rasko,D.A., Buckles,E.L., Liou,S.-R., Boutin,A., Hackett,J., Stroud,D., Mayhew,G.F., Rose,D.J., Zhou,S., Schwartz,D.C., Perna,N.T., Mobley,H.L.T., Donnenberg,M.S. and Blattner,F.R. |        |        |                 |
| TITLE      | Direct Submission                                                                                                                                                                                                                                      |        |        |                 |
| JOURNAL    | Submitted (20-JUN-2002) Genetics Laboratory, University of Wisconsin - Madison, 445 Henry Mall, Madison, WI 53706, USA                                                                                                                                 |        |        |                 |
| COMMENT    | Method: conceptual translation.                                                                                                                                                                                                                        |        |        |                 |
| FEATURES   | Location/Qualifiers                                                                                                                                                                                                                                    |        |        |                 |
| source     | 1..916                                                                                                                                                                                                                                                 |        |        |                 |
|            | /organism="Escherichia coli CFT073"                                                                                                                                                                                                                    |        |        |                 |
|            | /strain="CFT073"                                                                                                                                                                                                                                       |        |        |                 |
|            | /db_xref="taxon:199310"                                                                                                                                                                                                                                |        |        |                 |
| Protein    | 1..916                                                                                                                                                                                                                                                 |        |        |                 |
|            | /product="Aconitate hydratase 2"                                                                                                                                                                                                                       |        |        |                 |
|            | /EC_number="4.2.1.3"                                                                                                                                                                                                                                   |        |        |                 |
|            | /function="enzyme; Energy metabolism, carbon: TCA cycle"                                                                                                                                                                                               |        |        |                 |
| Region     | 53..897                                                                                                                                                                                                                                                |        |        |                 |
|            | /region_name="PRK09238"                                                                                                                                                                                                                                |        |        |                 |
|            | /note="Bifunctional aconitate hydratase                                                                                                                                                                                                                |        |        |                 |
|            | 2/2-methylisocitrate dehydratase; Validated"                                                                                                                                                                                                           |        |        |                 |
|            | /db_xref="CDD:236424"                                                                                                                                                                                                                                  |        |        |                 |
| CDS        | 1..916                                                                                                                                                                                                                                                 |        |        |                 |
|            | /gene="acnB"                                                                                                                                                                                                                                           |        |        |                 |
|            | /locus_tag="c0147"                                                                                                                                                                                                                                     |        |        |                 |
