# Supplementary material for: Metal complexation by histidine-rich peptides confers protective roles against cadmium stress in Escherichia coli as revealed by proteomics analysis
Source: PeerJ journal article supplement (doi:10.7717/peerj.5245), 2018-07-26
Supplement: Supplementary.zip [file Supplementary.zip]

MATRIX SCIENCE MASCOT Search Results

Protein View: gi|446211927

fructose-bisphosphate aldolase [Escherichia coli]

Database: NCBInr  
Score: 129  
Nominal mass (M<sub>r</sub>): 31062  
Calculated pI: 5.93  
Taxonomy: Escherichia coli

Sequence similarity is available as an NCBI BLAST search of gi|446211927 against nr.

Search parameters

MS data file: ii.mgf  
Enzyme: Trypsin: cuts C-term side of KR unless next residue is P.  
Fixed modifications: Carbamidomethyl (C)  
Variable modifications: Oxidation (M)

Protein sequence coverage: 11%

Matched peptides shown in bold red.

1 MYVVSTKQML NNAQRGGYAV PAFNIHNLET MQVVVETAAN LHAPVIIAGT  
51 PGTFTHAGTE NLLALVSAMA KHYHHPLAIH LDHHTKFDDI AQKVRSGVRS  
101 VMXDASHLPF AQNISRVKEV VDFCHRFDSV VEAELGQLGG QEDDVQVNEA  
151 DAFYTNPAQA REFPAETGID SLAVAIGTAH GMYASAPALD FSRLENIRQW  
201 VNLPLVLHGA SGLSTKDIQQ TIKLGICKIN VATELKNAFS QALKNYLTEH  
251 PEATDPRDYL QSAKSAMRDV VSKVIADCGC EGRA

Unformatted sequence string: 284 residues (for pasting into other applications).

Sort peptides by ☒ Residue Number ☐ Increasing Mass ☐ Decreasing Mass

Show predicted peptides also

| Query              | Start - End | Observed | Mr(expt)  | Mr(calc)  | Delta M | Score | Expect | Rank  | U | Peptide                       |
|--------------------|-------------|----------|-----------|-----------|---------|-------|--------|-------|---|-------------------------------|
| <a href="#">28</a> | 1 - 7       | 422.4000 | 842.7854  | 842.4208  | 0.3647  | 0     | 23     | 26    | 1 | U -_MYVVSTK.Q + Oxidation (M) |
| <a href="#">29</a> | 217 - 223   | 423.4300 | 844.8454  | 844.4654  | 0.3800  | 0     | 37     | 1.1   | 1 | U K.DIQQTIK.L                 |
| <a href="#">27</a> | 258 - 264   | 412.9000 | 823.7854  | 823.4076  | 0.3779  | 0     | 20     | 28    | 1 | U R.DYLGSAK.S                 |
| <a href="#">15</a> | 274 - 284   | 604.5400 | 1207.0654 | 1206.5121 | 0.5533  | 1     | 50     | 0.071 | 1 | U K.VIADCGCEGRA.-             |

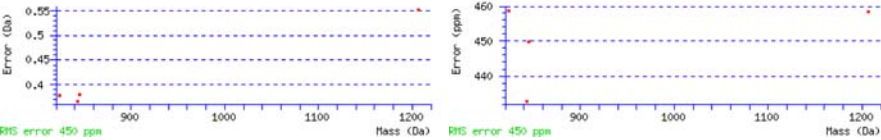

LOCUS WP\_000289782 284 aa linear BCT 23-JUL-2017  
DEFINITION tagatose bisphosphate family class II aldolase [Escherichia coli].  
ACCESSION WP\_000289782  
VERSION WP\_000289782.1  
KEYWORDS RefSeq.  
SOURCE Escherichia coli  
ORGANISM Escherichia coli  
Bacteria; Proteobacteria; Gammaproteobacteria; Enterobacterales; Enterobacteriaceae; Escherichia.  
COMMENT REFSEQ: This record represents a single, non-redundant, protein sequence which may be annotated on many different RefSeq genomes from the same, or different, species.  
COMPLETENESS: full length.  
FEATURES  
Location/Qualifiers  
source 1..284  
/organism="Escherichia coli"  
/db\_xref="taxon:562"  
Protein 1..284  
/product="tagatose bisphosphate family class II aldolase"  
Region 1..284  
/region\_name="gatY"  
/note="Tagatose-bisphosphate aldolase; Reviewed; PRK09195"  
/db\_xref="CDD:181690"  
Site order(27..29,32,52,55..57,61,65,68..69,142,233..234,236..237,240,244,247)  
/site\_type="other"  
/note="intersubunit interface [polypeptide binding]"  
/db\_xref="CDD:238477"  
Site order(82..83,179..181,183,208..209,211,230,232..233)  
/site\_type="active"  
/db\_xref="CDD:238477"  
Site order(83,180,208)  
/site\_type="other"  
/note="zinc binding site [ion binding]"  
/db\_xref="CDD:238477"  
Site order(179,181,183,209,211)  
/site\_type="other"  
/note="Na+ binding site [ion binding]"  
/db\_xref="CDD:238477"

Mascot: <http://www.matrixscience.com/>
