# Supplementary material for: Metal complexation by histidine-rich peptides confers protective roles against cadmium stress in Escherichia coli as revealed by proteomics analysis
Source: PeerJ journal article supplement (doi:10.7717/peerj.5245), 2018-07-26
Supplement: Supplementary.zip [file Supplementary.zip]



MASCOT Search Results

Protein View: gi|485811531

50S ribosomal protein L9 [Escherichia coli]

Database:NCBIInr

Score:134

Nominal mass (M<sub>r</sub>):15755

Calculated pI:6.17

Taxonomy:[Escherichia coli](#)

This protein sequence matches the following other entries:

- [gi|476855620](#) from [Escherichia coli P0298942.14](#)

Sequence similarity is available as [an NCBI BLAST search of gi|485811531 against nr](#).

Search parameters

MS data file:21.mgf

Enzyme:Trypsin: cuts C-term side of KR unless next residue is P.

Fixed modifications:[Carbamidomethyl \(C\)](#)

Variable modifications:[Oxidation \(M\)](#)

Protein sequence coverage: 15%

Matched peptides shown in **bold red**.

1 **MQVILLDK**VANLGSLGDQVNVKAGYARNFLVPQGKAVPATKKNIEFFEAR

51 **RAELEAK**LAEVLAAANARAEKINALETVPIASKAGDEGKL**FGSIGTR**DIAD

101 DAVTAAGVEVAKSEVRLPNGVLRRTTGEHEVSFQVHSEVFAKVIVNVVAE

Unformatted sequence string: **149 residues** (for pasting into other applications).

Sort peptides by ☒ Residue Number ☐ Increasing Mass ☐ Decreasing Mass

Show predicted peptides also

| Query              | Start - End | Observed | Mr (expt) | Mr (calc) | Delta M | Score | Expect | Rank  | U | Peptide                      |
|--------------------|-------------|----------|-----------|-----------|---------|-------|--------|-------|---|------------------------------|
| <a href="#">41</a> | 1 - 8       | 480.3000 | 958.5854  | 958.5521  | 0.0333  | 0     | 35     | 2.4   | 1 | --MQVILLDK.V                 |
| <a href="#">42</a> | 1 - 8       | 488.2600 | 974.5054  | 974.5470  | -0.0416 | 0     | 21     | 62    | 1 | --MQVILLDK.V + Oxidation (M) |
| <a href="#">43</a> | 1 - 8       | 488.8000 | 975.5854  | 974.5470  | 1.0384  | 0     | 21     | 55    | 3 | --MQVILLDK.V + Oxidation (M) |
| <a href="#">33</a> | 51 - 57     | 408.7500 | 815.4854  | 815.4501  | 0.0354  | 1     | 45     | 0.26  | 1 | R.RAELEAK.L                  |
| <a href="#">35</a> | 90 - 97     | 425.7500 | 849.4854  | 849.4709  | 0.0146  | 0     | 54     | 0.024 | 1 | U.K.LFGSIGTR.D               |





LOCUSWP\_001431354149 aa linear BCT 04-JAN-2014

DEFINITION50S ribosomal protein L9 [Escherichia coli].

ACCESSIONWP\_001431354

VERSIONWP\_001431354.1

KEYWORDSRefSeq.

SOURCEEscherichia coli

ORGANISMEscherichia coli

Bacteria; Proteobacteria; Gammaproteobacteria; Enterobacterales; Enterobacteriaceae; Escherichia.

COMMENTREFSEQ: This record represents a single, non-redundant, protein sequence which may be annotated on many different RefSeq genomes from the same, or different, species.

FEATURES

Location/Qualifiers

source1..149

/organism="Escherichia coli"

/db\_xref="taxon:562"

Protein1..149

/product="50S ribosomal protein L9"

/calculated\_mol\_wt=15634

Region1..149

/region\_name="rplI"

/note="50S ribosomal protein L9; Reviewed; PRK00137"

/db\_xref="CDD:234659"

Region2..47

/region\_name="Ribosomal\_L9\_N"

/note="Ribosomal protein L9, N-terminal domain; pfam01281"

/db\_xref="CDD:279605"

Region63..148

/region\_name="Ribosomal\_L9\_C"

/note="Ribosomal protein L9, C-terminal domain; pfam03948"

/db\_xref="CDD:281881"

Mascot: <http://www.matrixscience.com/>
