# Supplementary material for: Metal complexation by histidine-rich peptides confers protective roles against cadmium stress in Escherichia coli as revealed by proteomics analysis
Source: PeerJ journal article supplement (doi:10.7717/peerj.5245), 2018-07-26
Supplement: Supplementary.zip [file Supplementary.zip]

MATRIX  
SCIENCE

MASCOT Search Results

Protein View: gi|485778118

ATP synthase subunit beta [Escherichia coli]

Database:NCBInr

Score:51

Nominal mass (M<sub>r</sub>):50341

Calculated pI:4.90

Taxonomy:[Escherichia coli](#)

This protein sequence matches the following other entries:

gi|476706170

from [Escherichia coli P0298942.1](#)

gi|476789110

from [Escherichia coli 2862600](#)

gi|476836849

from [Escherichia coli P0298942.10](#)

gi|476849850

from [Escherichia coli P0298942.11](#)

gi|476856383

from [Escherichia coli P0298942.14](#)

gi|476859283

from [Escherichia coli P0298942.12](#)

gi|476864814

from [Escherichia coli P0298942.15](#)

gi|476864995

from [Escherichia coli P0298942.6](#)

gi|476865686

from [Escherichia coli P0298942.2](#)

gi|476880445

from [Escherichia coli P0298942.8](#)

gi|476881798

from [Escherichia coli P0298942.9](#)

gi|476883093

from [Escherichia coli P0298942.7](#)

gi|477055168

from [Escherichia coli 2733950](#)

gi|477081371

from [Escherichia coli P0298942.4](#)

gi|477081788

from [Escherichia coli P0298942.3](#)

Sequence similarity is available as [an NCBI BLAST search of gi|485778118 against nr](#).

Search parameters

MS data file:9-1.mgf

Enzyme:Trypsin: cuts C-term side of KR unless next residue is P.

Fixed modifications:[Carbamidomethyl \(C\)](#)

Variable modifications:[Oxidation \(M\)](#)

Protein sequence coverage: 4%

Matched peptides shown in **bold red**.

1MATGKIVQVI

GAVVDVEFPQ

DAVPRVYDAL

EVQNGNERLV

LEVQQQLGGG

51IVR**TIAMGSS DGLRR**

101EIGEEERWAI

HRAAPSYEEL

SNSQELLETG

IKVIDLMCPF

AKGGKVGLFG

151GAGVGKTVNM

MELIRNIAIE

HSGSVFAVG

GERTREGNDF

YHEMTDSNVI

201DKVSLVYGQM

NEPPGNRLRV

ALTGLTMAEK

FRDEGRDVLL

FVDNIYRYTL

251AGTEVSALLG

RMPSAVGYQP

TLAEMGVLQ

ERITSTKTGS

ITSVQAVYVP

301ADDLTDPSPA

TTFAHLDATV

VLSRQIASLG

IYPAVDPLDS

TSRQLDPLVV

351GQEHYDTARG

**VQSILQR**YQE

LKDIIAILGM

DELSEEDKL

VARARKIQRF

401LSQPPFFVAEV

FTGSPGKYVS

LKDTIRGFKG

IMEGEYDHL

EQAFYMGVSI

451EEAVEKAKKL

Unformatted sequence string: **460 residues** (for pasting into other applications).

Sort peptides by

Residue Number

Increasing Mass

Decreasing Mass

Show predicted peptides also

Query

Start - End

Observed

Mr (expt)

Mr (calc)

Delta

M

Score

Expect

Rank

U

Peptide

30

54 - 65

640.5900

1279.1654

1278.6350

0.5304

1

13

2.2e+002

7

R.TIAMGSSDGLRR.G + Oxidation (M)

24

360 - 367

450.9700

899.9254

899.5189

0.4066

0

38

0.71

1

R.GVQSILQR.Y

Error (Da)

0.5

0.45

0.4

900

1000

1100

1200

RMS error 433 ppm

Error (ppm)

450

440

430

420

900

1000

1100

1200

RMS error 433 ppm

LOCUSWP\_001401369460 aalinearBCT 16-AUG-2017

DEFINITIONF0F1 ATP synthase subunit beta [Escherichia coli].

ACCESSIONWP\_001401369

VERSIONWP\_001401369.1

KEYWORDSDRefSeq.

SOURCEEscherichia coli

ORGANISMEscherichia coli

Bacteria; Proteobacteria; Gammaproteobacteria; Enterobacterales; Enterobacteriaceae; Escherichia.

COMMENTREFSEQ: This record represents a single, non-redundant, protein sequence which may be annotated on many different RefSeq genomes from the same, or different, species.

COMPLETENESS: full length.

FEATURES

source

1..460

/organism="Escherichia coli"

/db\_xref="taxon:562"

Protein

1..460

/product="F0F1 ATP synthase subunit beta"

/EC\_number="3.6.3.14"

/calculated\_mol\_wt=50184

Region

1..460

/region\_name="PRK09280"

/note="F0F1 ATP synthase subunit beta; Validated"

/db\_xref="CDD:236447"

Region

6..72

/region\_name="ATP-synt\_ab\_N"

/note="ATP synthase alpha/beta family, beta-barrel domain; pfam02874"

/db\_xref="CDD:280947"

Region

75..347

/region\_name="F1-ATPase\_beta"

/note="F1 ATP synthase beta subunit, nucleotide-binding domain. The F-ATPase is found in bacterial plasma membranes, mitochondrial inner membranes and in chloroplast thylakoid membranes. It has also been found in the archaea Methanosarcina barkeri. It uses a...; cd01133"

/db\_xref="CDD:238553"

Site

order(98,115,117..118,120,122,183..185,188,210..212,217,247,250,254,260..262,264..265,270,274,281,298,301..302,306,313,315..317,328..329,338..339,341,343)

/site\_type="other"

/note="alpha subunit interaction interface [polypeptide binding]"

/db\_xref="CDD:238553"

Site

151..157

/site\_type="other"

/note="Walker A motif"

/db\_xref="CDD:238553"

Site

order(153,156..158,182..183,186,243,247,331..332)

/site\_type="other"

http://mascot/mascot/cgi/protein\_view.pl?file=.%2Fdata%2F20180206%2FF004365.dat&hit=gi%7C485778118&db\_idx=1&px=1&ave\_thresh=49&... 1/2
