# Supplementary material for: Metal complexation by histidine-rich peptides confers protective roles against cadmium stress in Escherichia coli as revealed by proteomics analysis
Source: PeerJ journal article supplement (doi:10.7717/peerj.5245), 2018-07-26
Supplement: Supplementary.zip [file Supplementary.zip]

MATRIX SCIENCE MASCOT Search Results

Protein View: gi|727822902

amino acid ABC transporter substrate-binding protein [Vibrio sp. OY15]

Database: NCBIInr  
Score: 85  
Nominal mass (M<sub>r</sub>): 29620  
Calculated pI: 6.82  
Taxonomy: [Vibrio sp. OY15](#)

This protein sequence matches the following other entries:

- [gi|673918629](#) from [Vibrio sp. OY15](#)

Sequence similarity is available as [an NCBI BLAST search of gi|727822902 against nr](#).

Search parameters

MS data file: 745.mgf  
Enzyme: Trypsin: cuts C-term side of KR unless next residue is P.  
Fixed modifications: [Carbamidomethyl \(C\)](#)  
Variable modifications: [Oxidation \(M\)](#)

Protein sequence coverage: 4%

Matched peptides shown in **bold red**.

1 MKKLLCFAAL GLAVSTTVNA DPILDDIKST GELKVCFD SG YMPFEMTAKN  
51 GQYIGFDIDL GRQMARAMDV KFPVNTSWD GIPTLLTGK CHMIMGGMTI  
101 TPMRNTQVNF ADPYVVIGQS ILVDLKHEGK VSSYRDLNSP EYVVKTL**GT**  
151 **TGEQAVK**RYL PKAKINLYET QSEAVLEVAN GKVD AFVYDF PYNSIYVAEN  
201 KKQLMHLAKP FTYEPLGWAV PQGNPDTLNF LNNYLRLQIK DGTYDRIYDK  
251 WFNDKWLKQ VK

Unformatted sequence string: **262 residues** (for pasting into other applications).

Sort peptides by ☒ Residue Number ☐ Increasing Mass ☐ Decreasing Mass

Show predicted peptides also

| Query              | Start - End | Observed | Mr (expt) | Mr (calc) | Delta  | M | Score | Expect | Rank     | U | Peptide         |
|--------------------|-------------|----------|-----------|-----------|--------|---|-------|--------|----------|---|-----------------|
| <a href="#">17</a> | 148 - 157   | 502.3000 | 1002.5854 | 1002.5346 | 0.0509 | 0 | 49    | 1.8    | <u>1</u> | U | K.LGTTGEQAVK.R  |
| <a href="#">21</a> | 148 - 158   | 580.3500 | 1158.6854 | 1158.6357 | 0.0498 | 1 | 36    | 29     | <u>1</u> | U | K.LGTTGEQAVKR.Y |

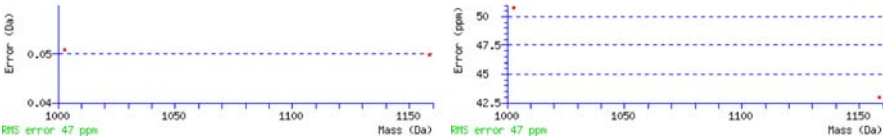

LOCUS WP\_033906142 262 aa linear BCT 29-MAY-2016  
DEFINITION MULTISPECIES: amino acid ABC transporter substrate-binding protein [Vibrio].  
ACCESSION WP\_033906142  
VERSION WP\_033906142.1  
KEYWORDS RefSeq.  
SOURCE Vibrio  
ORGANISM Vibrio  
Bacteria; Proteobacteria; Gammaproteobacteria; Vibrionales; Vibrionaceae.  
COMMENT REFSEQ: This record represents a single, non-redundant, protein sequence which may be annotated on many different RefSeq genomes from the same, or different, species.  
COMPLETENESS: full length.  
FEATURES  
source 1..262  
/organism="Vibrio"  
/db\_xref="taxon:662"  
Protein 1..262  
/product="amino acid ABC transporter substrate-binding protein"  
/calculated\_mol\_wt=29337  
Region 32..252  
/region\_name="PBP2\_Dsm1740"  
/note="Amino acid-binding domain of the type 2 periplasmic binding fold superfamily; cd13629"  
/db\_xref="CDD:270347"  
Region 33..253  
/region\_name="SBP\_bac\_3"  
/note="Bacterial extracellular solute-binding proteins, family 3; pfam00497"  
/db\_xref="CDD:278898"  
Site order(38,41,79,97..99,104,147,150..151,171,188..189)  
/site\_type="other"  
/note="ligand binding site [chemical binding]"  
/db\_xref="CDD:270347"  
Site order(105..106,109..111,213,215,222,226,229..230,233..234,237,245,248)  
/site\_type="other"  
/note="oligomer interface [polypeptide binding]"  
/db\_xref="CDD:270347"

Mascot: <http://www.matrixscience.com/>
