# Supplementary material for: Metal complexation by histidine-rich peptides confers protective roles against cadmium stress in Escherichia coli as revealed by proteomics analysis
Source: PeerJ journal article supplement (doi:10.7717/peerj.5245), 2018-07-26
Supplement: Supplementary.zip [file Supplementary.zip]

MATRIX SCIENCE MASCOT Search Results

Protein View: gi|928847216

universal stress protein UspD [Escherichia coli]

Database: NCBIInr  
Score: 30  
Nominal mass (M<sub>r</sub>): 16396  
Calculated pI: 6.64  
Taxonomy: Escherichia coli

This protein sequence matches the following other entries:

- gi|922650545 from Escherichia coli

Sequence similarity is available as an NCBI BLAST search of gi|928847216 against nr.

Search parameters

MS data file: G2.mgf  
Enzyme: Trypsin: cuts C-term side of KR unless next residue is P.  
Fixed modifications: Carbamidomethyl (C)  
Variable modifications: Oxidation (M)

Protein sequence coverage: 11%

Matched peptides shown in bold red.

1 MAYKHIGVAI SGNEEDALLV NKALELARHN DAHLTLIHID DGLSELYPGI  
51 YFPATEDILQ LLKNKSDNKL YKLTNIIQWP KTKLRIERGE MPETLLEIMQ  
101 **K****EQCNLLVCG** **HHHSFINR**.L PAYRGMINKM SADLLIVPFI DK

Unformatted sequence string: 142 residues (for pasting into other applications).

Sort peptides by ☒ Residue Number ☐ Increasing Mass ☐ Decreasing Mass

Show predicted peptides also

| Query              | Start - End | Observed | Mr(expt)  | Mr(calc)  | Delta   | M Score | Expect | Rank | U | Peptide               |
|--------------------|-------------|----------|-----------|-----------|---------|---------|--------|------|---|-----------------------|
| <a href="#">34</a> | 102 - 118   | 707.2700 | 2118.7882 | 2119.9792 | -1.1911 | 0 30    | 3.2    | 1    | U | K.EQCNLLVCGHHHSFINR.L |

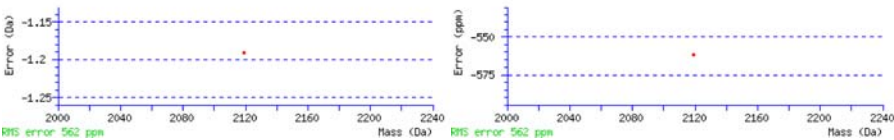

LOCUS WP\_053897192 142 aa linear BCT 16-AUG-2017  
DEFINITION MULTISPECIES: universal stress protein UspD [Enterobacteriaceae].  
ACCESSION WP\_053897192  
VERSION WP\_053897192.1  
KEYWORDS RefSeq.  
SOURCE Enterobacteriaceae  
ORGANISM Enterobacteriaceae  
Bacteria; Proteobacteria; Gammaproteobacteria; Enterobacterales.  
COMMENT REFSEQ: This record represents a single, non-redundant, protein sequence which may be annotated on many different RefSeq genomes from the same, or different, species.  
COMPLETENESS: full length.  
FEATURES  
source Location/Qualifiers  
1..142  
/organism="Enterobacteriaceae"  
/db\_xref="taxon:543"  
Protein 1..142  
/product="universal stress protein UspD"  
/calculated\_mol\_wt=16161  
Region 1..142  
/region\_name="PRK09982"  
/note="universal stress protein UspD; Provisional"  
/db\_xref="CDD:137627"

Mascot: <http://www.matrixscience.com/>
