# Supplementary material for: Metal complexation by histidine-rich peptides confers protective roles against cadmium stress in Escherichia coli as revealed by proteomics analysis
Source: PeerJ journal article supplement (doi:10.7717/peerj.5245), 2018-07-26
Supplement: Supplementary.zip [file Supplementary.zip]

MATRIX SCIENCE MASCOT Search Results

Protein View: gi|828163674

uridine phosphorylase [Moellerella wisconsensis]

Database: NCBI  
Score: 158  
Nominal mass (M<sub>r</sub>): 27264  
Calculated pI: 5.64  
Taxonomy: Moellerella wisconsensis

This protein sequence matches the following other entries:

- gi|827595280 from Moellerella wisconsensis
- gi|1928454144 from Moellerella wisconsensis ATCC 35017

Sequence similarity is available as an NCBI BLAST search of gi|828163674 against nr.

Search parameters

MS data file: 190.mgf  
Enzyme: Trypsin: cuts C-term side of KR unless next residue is P.  
Fixed modifications: Carbamidomethyl (C)  
Variable modifications: Oxidation (M)

Protein sequence coverage: 8%

Matched peptides shown in bold red.

1 M**SDVFHLGLK** KSDLQGATLA IVPGDPKRVE KIARLMDNPV HLASLREFTS  
51 WRGEVDGKAV IVCSTGIGGP STSIAVEELA QLGINTFLRI GTTGAIQENI  
101 NVGDLVLTAA SVRLDGASQH FAPLEYPAVA DPECTNALYA AAKDAGAVVH  
151 VGVTAASDTF YPGQERYDTY TGRVVSFRFG SMKENQQMGV MNYEMESATL  
201 LTMCSQGLR **SGMVAGIVNV** RTQQEIPNEE LLKKTESNVL GIVVDAARRL  
251 LK

Unformatted sequence string: 252 residues (for pasting into other applications).

Sort peptides by ☒ Residue Number ☐ Increasing Mass ☐ Decreasing Mass

Show predicted peptides also

| Query              | Start - End | Observed | Mr (expt) | Mr (calc) | Delta   | M | Score | Expect   | Rank | U  | Peptide                                 |
|--------------------|-------------|----------|-----------|-----------|---------|---|-------|----------|------|----|-----------------------------------------|
| <a href="#">69</a> | 2 - 10      | 339.0900 | 1014.2482 | 1014.5498 | -0.3017 | 0 | 36    | 25       | 1    | .. | M.SDV <b>FHLGLK</b> .K                  |
| <a href="#">70</a> | 2 - 10      | 508.1500 | 1014.2854 | 1014.5498 | -0.2644 | 0 | 57    | 0.18     | 1    |    | M.SDV <b>FHLGLK</b> .K                  |
| <a href="#">83</a> | 2 - 11      | 572.2000 | 1142.3854 | 1142.6448 | -0.2593 | 1 | 31    | 80       | 2    |    | M.SDV <b>FHLGLK</b> .S                  |
| <a href="#">78</a> | 211 - 221   | 551.7600 | 1101.5054 | 1101.5965 | -0.0910 | 0 | 70    | 0.012    | 5    | U  | R.SGM <b>VAGIVNV</b> .T                 |
| <a href="#">80</a> | 211 - 221   | 559.7400 | 1117.4654 | 1117.5914 | -0.1259 | 0 | 29    | 1.6e+002 | 1    | U  | R.SGM <b>VAGIVNV</b> .T + Oxidation (M) |

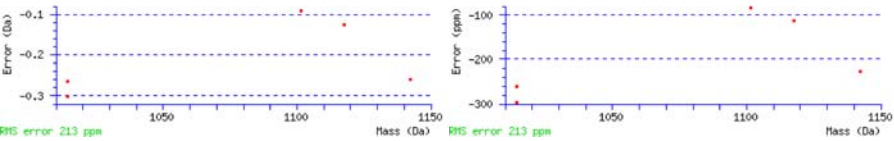

LOCUS WP\_047254674 252 aa linear BCT 08-JUN-2015  
DEFINITION uridine phosphorylase [Moellerella wisconsensis].  
ACCESSION WP\_047254674  
VERSION WP\_047254674.1  
KEYWORDS RefSeq.  
SOURCE Moellerella wisconsensis  
ORGANISM Moellerella wisconsensis  
Bacteria; Proteobacteria; Gammaproteobacteria; Enterobacterales; Morganellaceae; Moellerella.  
COMMENT REFSEQ: This record represents a single, non-redundant, protein sequence which may be annotated on many different RefSeq genomes from the same, or different, species.  
COMPLETENESS: full length.  
FEATURES  
source Location/Qualifiers  
1..252  
/organism="Moellerella wisconsensis"  
/db\_xref="taxon:158849"  
Protein 1..252  
/product="uridine phosphorylase"  
/EC\_number="2.4.2.3"  
/calculated\_mol\_wt=26979  
Region 1..251  
/region\_name="PRK11178"  
/note="uridine phosphorylase; Provisional"  
/db\_xref="CDD:183018"

Mascot: <http://www.matrixscience.com/>
