# Supplementary material for: Metal complexation by histidine-rich peptides confers protective roles against cadmium stress in Escherichia coli as revealed by proteomics analysis
Source: PeerJ journal article supplement (doi:10.7717/peerj.5245), 2018-07-26
Supplement: Supplementary.zip [file Supplementary.zip]



MASCOT Search Results

Protein View: gi|485723954

malate dehydrogenase [Escherichia coli]

Database: NCBItr

Score: 207

Nominal mass (M<sub>r</sub>): 32532

Calculated pI: 5.62

Taxonomy: [Escherichia coli](#)

This protein sequence matches the following other entries:

- [gi|323966415](#) from [Escherichia coli M863](#)
- [gi|327251329](#) from [Escherichia coli STEC 7v](#)
- [gi|386140017](#) from [Escherichia coli 1.2741](#)
- [gi|914355797](#) from [Escherichia coli](#)

Sequence similarity is available as [an NCBI BLAST search of gi|485723954 against nr](#).

Search parameters

MS data file: 20.mgf

Enzyme: Trypsin: cuts C-term side of KR unless next residue is P.

Fixed modifications: [Carbamidomethyl \(C\)](#)

Variable modifications: [Oxidation \(M\)](#)

Protein sequence coverage: 20%

Matched peptides shown in **bold red**.

1 MKVAVLGAAG GIGQALALL KTQLPSGSEL SLYDIAPVTP GVAVDLSHIP

51 TAVKIKGFSG EDATPALEGA DVVLISAGVA RKPMDRSDL FNVNAGIVK**N**

101 **LVQQVAK**TCP KACIGIITNP VNTTVAIAAE VLKKAGVYDK NKLFGVTTLD

151 IIR**SNTFVAE LK**GRQPGGEV VPVIGGHSV TILPLLSQVP GVSFTEQEVA

201 ELTKR**IQNAG TEVVEAKAGG GSATLSMGQA AARFGLSLVR** ALQGEQGVVE

251 CAYVEGDGQY ARFFSQPLLL GKNGVEERKS IGTLTSTFEQN ALEGMLDTLK

301 **KDIALGEEFV NK**

Unformatted sequence string: **312 residues** (for pasting into other applications).

Sort peptides by ☒ Residue Number ☐ Increasing Mass ☐ Decreasing Mass

Show predicted peptides also

| Query              | Start - End | Observed | Mr (expt) | Mr (calc) | Delta M | Score | Expect | Rank  | U                 | Peptide                                     |
|--------------------|-------------|----------|-----------|-----------|---------|-------|--------|-------|-------------------|---------------------------------------------|
| <a href="#">28</a> | 100 - 107   | 450.4800 | 898.9454  | 898.5236  | 0.4218  | 0     | 40     | 0.47  | <a href="#">1</a> | <b>U K.NLVQQVAK.T</b>                       |
| <a href="#">30</a> | 154 - 162   | 505.0100 | 1008.0054 | 1007.5287 | 0.4767  | 0     | 23     | 19    | <a href="#">1</a> | <b>R.SNTFVAELK.G</b>                        |
| <a href="#">41</a> | 206 - 217   | 630.1000 | 1258.1854 | 1257.6565 | 0.5290  | 0     | 36     | 1.1   | <a href="#">1</a> | <b>R.IQNAGTEVVEAK.A</b>                     |
| <a href="#">48</a> | 218 - 233   | 711.6500 | 1421.2854 | 1420.6729 | 0.6126  | 0     | 52     | 0.024 | <a href="#">1</a> | <b>K.AGGGSATLSMGQAAAR.F + Oxidation (M)</b> |
| <a href="#">23</a> | 234 - 240   | 396.4500 | 790.8854  | 790.4701  | 0.4153  | 0     | 17     | 66    | <a href="#">1</a> | <b>R.FGLSLVR.A</b>                          |
| <a href="#">28</a> | 302 - 312   | 618.0900 | 1234.1654 | 1233.6241 | 0.5413  | 0     | 39     | 0.45  | <a href="#">1</a> | <b>K.DIALGEEFVNK.-</b>                      |





LOCUS WP\_001354992 312 aa linear BCT 11-MAY-2013

DEFINITION malate dehydrogenase [Escherichia coli].

ACCESSION WP\_001354992

VERSION WP\_001354992.1

KEYWORDS RefSeq.

SOURCE Escherichia coli

ORGANISM Escherichia coli

Bacteria; Proteobacteria; Gammaproteobacteria; Enterobacterales; Enterobacteriaceae; Escherichia.

COMMENT REFSEQ: This record represents a single, non-redundant, protein sequence which may be annotated on many different RefSeq genomes from the same, or different, species.

FEATURES Location/Qualifiers

source

1..312

/organism="Escherichia coli"

/db\_xref="taxon:562"

Protein

1..312

/product="malate dehydrogenase"

/calculated\_mol\_wt=32250

Region

1..312

/region\_name="PRK05086"

/note="malate dehydrogenase; Provisional"

/db\_xref="CDD:235340"

Mascot: <http://www.matrixscience.com/>
