# Supplementary material for: Metal complexation by histidine-rich peptides confers protective roles against cadmium stress in Escherichia coli as revealed by proteomics analysis
Source: PeerJ journal article supplement (doi:10.7717/peerj.5245), 2018-07-26
Supplement: Supplementary.zip [file Supplementary.zip]

MATRIX  
SCIENCE

MASCOT Search Results

Protein View: gi|1311039

Chain A, Dipeptide Binding Protein Complex With Glycyl-L-Leucine

Database: NCBInr  
Score: 59  
Nominal mass (M<sub>r</sub>): 57599  
Calculated pI: 5.75  
Taxonomy: [Escherichia coli](#)

This protein sequence matches the following other entries:

- [gi|1311041](#) from [Escherichia coli](#)
- [gi|1311043](#) from [Escherichia coli](#)
- [gi|1311045](#) from [Escherichia coli](#)

Sequence similarity is available as [an NCBI BLAST search of gi|1311039 against nr](#).

Search parameters

MS data file: 8-2.mgf  
Enzyme: Trypsin: cuts C-term side of KR unless next residue is P.  
Fixed modifications: [Carbamidomethyl \(C\)](#)  
Variable modifications: [Oxidation \(M\)](#)

Protein sequence coverage: 3%

Matched peptides shown in **bold red**.

1 KTLVYCSGSG PEGFNPQLFT SGTTYDASSV PLYNRLVEFK IGTTTEVIPGL  
51 AEKWEVSEGD KTYTFHLRKG VKWHDNKEFK PTRELNADDV VFSFDRQKNA  
101 QNPYHKVSGG SYEYFEGMGL PELISEVKKV DDNTVQFVLT RPEAPFLADL  
151 AMDFASILSK EVADAMMKAG TPEKLDLNPI GTGPFQLQQY QKDSRIRYKA  
201 FDGYWGTPKQ IDTLVFSITP DASVRYAKLQ KNECQVMYP NPADIARMKQ  
251 DKSINLMEMP GLNVGYLSYN VQ**KPLDDVK VR**QALTYAVN KDIIK**AVYQ**  
301 **GAGVS**AKNLI PPTMWGYNDQ VQDYTYDPEK AKALLKEAGL EKGFSIDLWA  
351 MPVQRPNPN ARMAEMIQA DWAKVGVOAK IVTYEWGEYL KRAKDGEHQT  
401 VMWGWTGDNG DPDNFFATLF SCAASEQGSN YSKWCYKPE DLIQPARATD  
451 DHNKRVELYK QAVVMHDQA PALIIAHSTV FEPVRKEVKG YVVDPLGKHH  
501 FENVSIE

Unformatted sequence string: **507 residues** (for pasting into other applications).

Sort peptides by ☒ Residue Number ☐ Increasing Mass ☐ Decreasing Mass

Show predicted peptides also

| Query              | Start - End | Observed | Mr (expt) | Mr (calc) | Delta  | M | Score | Expect   | Rank | U  | Peptide        |
|--------------------|-------------|----------|-----------|-----------|--------|---|-------|----------|------|----|----------------|
| <a href="#">37</a> | 274 - 282   | 357.3700 | 1069.0882 | 1068.6291 | 0.4590 | 1 | 13    | 2.2e+002 | 8    | .. | K.KPLDDVKVR.Q  |
| <a href="#">34</a> | 297 - 307   | 526.0100 | 1050.0054 | 1049.5506 | 0.4549 | 0 | 47    | 0.089    | 2    | U  | K.AVYQAGVSAS.K |

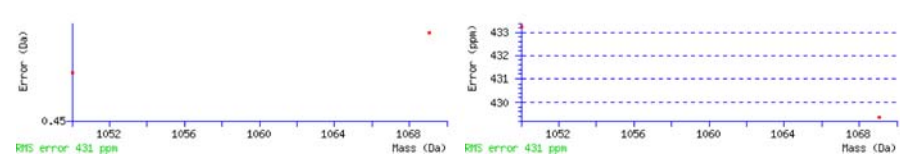

LOCUS 1DPP\_A 507 aa linear BCT 10-OCT-2012  
DEFINITION Chain A, Dipeptide Binding Protein Complex With Glycyl-L-Leucine.  
ACCESSION 1DPP\_A  
VERSION 1DPP\_A  
DBSOURCE pdb: molecule 1DPP, chain 65, release Jun 6, 2011;  
deposition: Aug 11, 1995;  
class: Peptide Binding Protein;  
source: Mmdb\_id: 71888, Pdb\_id 1: 1DPP;  
Exp. method: X-Ray Diffraction.  
KEYWORDS .  
SOURCE Escherichia coli  
ORGANISM Escherichia coli  
Bacteria; Proteobacteria; Gammaproteobacteria; Enterobacterales;  
Enterobacteriaceae; Escherichia.  
REFERENCE 1 (residues 1 to 507)  
AUTHORS Dunten,P. and Mowbray,S.L.  
TITLE Crystal structure of the dipeptide binding protein from Escherichia coli involved in active transport and chemotaxis  
JOURNAL Protein Sci. 4 (11), 2327-2334 (1995)  
PUBMED 8563629  
REFERENCE 2 (residues 1 to 507)  
AUTHORS Dunten,P. and Mowbray,S.L.  
TITLE Direct Submission  
JOURNAL Submitted (11-AUG-1995)  
COMMENT 1 Dipeptide Binding Protein.  
FEATURES  
Location/Qualifiers  
source 1..507  
/organism="Escherichia coli"  
/db\_xref="taxon:562"  
Region join(1..35,176..241,487..507)  
/region name="Domain 1"  
/note="NCBI Domains"  
SecStr 1..9  
/sec\_str\_type="sheet"  
/note="strand 1"  
Region 2..491  
/region name="PBP2\_DppA like"  
/note="The substrate-binding component of an ABC-type dipeptide import system contains the type 2 periplasmic binding fold; cd08493"  
/db\_xref="CDD:173858"  
Region 4..507  
/region name="PRK15109"  
/note="antimicrobial peptide ABC transporter periplasmic binding protein SapA; Provisional"  
/db\_xref="CDD:185064"  
Bond bond(6,234)  
/bond\_type="disulfide"  
SecStr 21..28  
/sec\_str\_type="helix"  
/note="helix 1"  
SecStr 31..34  
/sec\_str\_type="sheet"  
/note="strand 2"  
Region join(36..50,143..156)  
/region name="Domain 2"  
/note="NCBI Domains"  
SecStr 37..40  
/sec\_str\_type="sheet"  
/note="strand 3"  
SecStr 45..48  
/sec\_str\_type="sheet"
