# Supplementary material for: Metal complexation by histidine-rich peptides confers protective roles against cadmium stress in Escherichia coli as revealed by proteomics analysis
Source: PeerJ journal article supplement (doi:10.7717/peerj.5245), 2018-07-26
Supplement: Supplementary.zip [file Supplementary.zip]

MATRIX SCIENCE MASCOT Search Results

Protein View: gi|723058084

molecular chaperone HtpG [Escherichia coli]

Database: NCBIInr  
Score: 131  
Nominal mass (M<sub>r</sub>): 71418  
Calculated pI: 5.06  
Taxonomy: Escherichia coli

Sequence similarity is available as an NCBI BLAST search of gi|723058084 against nr.

Search parameters

MS data file: 4-2.mgf  
Enzyme: Trypsin: cuts C-term side of KR unless next residue is P.  
Fixed modifications: Carbamidomethyl (C)  
Variable modifications: Oxidation (M)

Protein sequence coverage: 9%

Matched peptides shown in bold red.

1 MKGQETRGFQ SEVKQLLYLM IHSLYSNKEI FLRE**ELISNAS DAADKLR**FRA  
51 LSNPDLYEGD GELRVVVSFD KDKRTLISD NGVGMTRDEV IDHLGTIAKS  
101 GTKSPLESGL SDQAKDSQLI GQFGVGFYSA FIVADKVTVR TRAAGEKPEN  
151 GVFWESAGEG EYTVADITKE DRGTEITLHL REGEDEFLDD WVRVSIISKY  
201 SDHIALPVEI EKREKDGDET IISWEKINKA QALWTRNKSE ITDEEYKEFY  
251 KHIAHDFNDP LTWSHNRVEG KQEYTSLLYI PSQAPWDMWN RDHKHGLKLY  
301 VQRVPIMDDA EQFMPNYLRF VRGLIDSSDL PLNVSR**EILQ DSTVTR**NLRN  
351 ALTKRVLQML EKLAKDAAEK YQTFWQQFGL VLK**EGPAEDF ANQEAI**AKLL  
401 RFASTHTDSS AQTVSLEDYV SRMKEGQEKI YYITADSYAA AKSSPHLELL  
451 RKKGIEVLLI SDRIDEWMNN YLTFDFGKPF QSVSKVDES**L**E**LADEVDES**  
501 **AKAEAK**LTP FIDRVKALLG ERVKDVRLLH RLTDTPAIVS TDAEMSTQM  
551 AKLFAAAGQK VPEVKYIFEL NPDHVLVKRA ADTEDEAKFS EWWELLLDQA  
601 LLAERGTLTD PNLFIR**RMNQ L**LV**S**

Unformatted sequence string: 624 residues (for pasting into other applications).

Sort peptides by: ☒ Residue Number ☐ Increasing Mass ☐ Decreasing Mass

Show predicted peptides also

| Query              | Start - End | Observed | Mr (expt) | Mr (calc) | Delta  | M Score | Expect | Rank     | U | Peptide                         |
|--------------------|-------------|----------|-----------|-----------|--------|---------|--------|----------|---|---------------------------------|
| <a href="#">43</a> | 34 - 47     | 501.8400 | 1502.4982 | 1501.7736 | 0.7246 | 1       | 24     | 19       | 1 | U R.ELISNASDAADKLR.F            |
| <a href="#">41</a> | 337 - 346   | 581.5800 | 1161.1454 | 1160.6037 | 0.5417 | 0       | 46     | 0.098    | 1 | U R.EILQDSTVTR.N                |
| <a href="#">45</a> | 384 - 398   | 795.7100 | 1589.4054 | 1588.7369 | 0.6686 | 0       | 14     | 1.6e+002 | 1 | U K.EGPAEDFANQEAIK.L            |
| <a href="#">44</a> | 493 - 506   | 512.1500 | 1533.4282 | 1532.7206 | 0.7076 | 1       | 24     | 15       | 1 | U K.LADEVDESAAEK.A              |
| <a href="#">35</a> | 617 - 624   | 488.9900 | 975.9654  | 975.5171  | 0.4483 | 1       | 24     | 21       | 1 | U R.RMNQLLV.S - + Oxidation (M) |

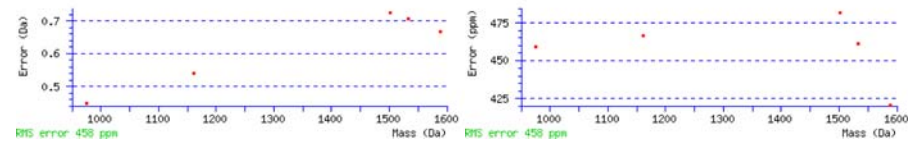

LOCUS WP\_033552820 624 aa linear BCT 27-OCT-2015  
DEFINITION molecular chaperone HtpG [Escherichia coli].  
ACCESSION WP\_033552820  
VERSION WP\_033552820.1  
KEYWORDS RefSeq.  
SOURCE Escherichia coli  
ORGANISM Escherichia coli  
Bacteria; Proteobacteria; Gammaproteobacteria; Enterobacterales; Enterobacteriaceae; Escherichia.  
COMMENT REFSEQ: This record represents a single, non-redundant, protein sequence which may be annotated on many different RefSeq genomes from the same, or different, species.  
COMPLETENESS: full length.  
FEATURES  
source 1..624  
/organism="Escherichia coli"  
/db\_xref="taxon:562"  
Protein 1..624  
/product="molecular chaperone HtpG"  
/calculated\_mol\_wt=71332  
Region 4..623  
/region\_name="PRK05218"  
/note="heat shock protein 90; Provisional"  
/db\_xref="CDD:235366"  
Region 27..154  
/region\_name="HATPase\_c"  
/note="Histidine kinase-like ATPases; smart00387"  
/db\_xref="CDD:214643"  
Site order(34,38,41,78,80,82,84..85,124..127,164,168,173..174,176)  
/site\_type="other"  
/note="ATP binding site [chemical binding]"  
/db\_xref="CDD:238030"  
Site 38  
/site\_type="other"  
/note="Mg2+ binding site [ion binding]"  
/db\_xref="CDD:238030"  
Site order(82,84,124,126)  
/site\_type="other"  
/note="G-X-G motif"  
/db\_xref="CDD:238030"  
Region 186..622  
/region\_name="HSP90"  
/note="Hsp90 protein; pfam00183"  
/db\_xref="CDD:278607"
