# Supplementary material for: Metal complexation by histidine-rich peptides confers protective roles against cadmium stress in Escherichia coli as revealed by proteomics analysis
Source: PeerJ journal article supplement (doi:10.7717/peerj.5245), 2018-07-26
Supplement: Supplementary.zip [file Supplementary.zip]

MATRIX SCIENCE MASCOT Search Results

Protein View: gi|446370258

glycerol-3-phosphate dehydrogenase [Escherichia coli]

Database: NCBIInr  
Score: 62  
Nominal mass (M<sub>r</sub>): 57087  
Calculated pI: 6.99  
Taxonomy: Escherichia coli

This protein sequence matches the following other entries:

- gi|388345717 from Escherichia coli O103:H25 str. CVM9340
- gi|606890078 from Escherichia coli O103:H25 str. 2010C-4529
- gi|1937725287 from Escherichia coli

Sequence similarity is available as an NCBI BLAST search of gi|446370258 against nr.

Search parameters

MS data file: U.mgf  
Enzyme: Trypsin: cuts C-term side of KR unless next residue is P.  
Fixed modifications: Carbamidomethyl (C)  
Variable modifications: Oxidation (M)

Protein sequence coverage: 4%

Matched peptides shown in bold red.

1 METKDLIVIG GGINGAGIAA DAAGRGLSVL MLEAQDLACA TSSASSKLIH  
51 GGLRYLEHYE FRLVSEALAE REVLLKMAPI IAFPMRFRLP HRPHLRPAWM  
101 IRIGLFMYDH LKGR**TSLPGS TGLA**FGANSV LKPEIKRGFE YSDCWVDDAR  
151 LVLANAQMVV RK**GGEVLTR**T HATSARRENG LWIVEARDID TGGKYSWQAR  
201 GLVNATGPWV KQFFDEGMHL PSPYIGIRLIK **GSHIVVPR**VH TQKQAYILQN  
251 EDKRIVFVIP WMDEFSIIGT TDVEYKGDPK AVKIEESEIN YLLKVYNTHF  
301 KKQLSRDDIV WTYSQVRPLC DDES DSPQAI TRDYTLDIHD ENGKAPLLSV  
351 FGGKLTTRYK LAEHALEKLT PYYQGIGPAN TKESVLPGGA IEGDRDDYAA  
401 RLRRRYPFLT ESLARHYART YGNSSELLLG NAGTVSDLGE DFGHEFYEAE  
451 LKYLVDHEWV RRADDALWRR TKQGMWLNAD QQSRVSQWLW EYTQKLSLA  
501 SYG

Unformatted sequence string: 503 residues (for pasting into other applications).

Sort peptides by ☒ Residue Number ☐ Increasing Mass ☐ Decreasing Mass

Show predicted peptides also

| Query              | Start - End | Observed | Mr (expt) | Mr (calc) | Delta  | M Score | Expect | Rank     | U | Peptide          |
|--------------------|-------------|----------|-----------|-----------|--------|---------|--------|----------|---|------------------|
| <a href="#">29</a> | 115 - 124   | 494.9800 | 987.9454  | 987.5349  | 0.4105 | 0       | 9      | 6.2e+002 | 9 | U R.TSLPGSTGLR.F |
| <a href="#">16</a> | 163 - 169   | 366.3800 | 730.7454  | 730.3974  | 0.3481 | 0       | 42     | 0.12     | 1 | U K.GGEVLTR.T    |
| <a href="#">25</a> | 231 - 238   | 432.9500 | 863.8854  | 863.4977  | 0.3877 | 0       | 13     | 2.3e+002 | 1 | U K.GSHIVVPR.V   |

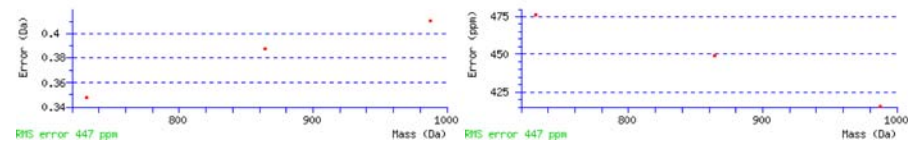

LOCUS WP\_000448113 503 aa linear BCT 15-MAY-2013  
DEFINITION glycerol-3-phosphate dehydrogenase [Escherichia coli].  
ACCESSION WP\_000448113  
VERSION WP\_000448113.1  
KEYWORDS RefSeq.  
SOURCE Escherichia coli  
ORGANISM Escherichia coli  
Bacteria; Proteobacteria; Gammaproteobacteria; Enterobacterales; Enterobacteriaceae; Escherichia.  
COMMENT REFSEQ: This record represents a single, non-redundant, protein sequence which may be annotated on many different RefSeq genomes from the same, or different, species.  
COMPLETENESS: full length.  
FEATURES  
source Location/Qualifiers  
1..503  
/organism="Escherichia coli"  
/db\_xref="taxon:562"  
Protein 1..503  
/product="glycerol-3-phosphate dehydrogenase"  
/calculated\_mol\_wt=56821  
Region 27..501  
/region\_name="glpD"  
/note="glycerol-3-phosphate dehydrogenase; Reviewed; PRK12266"  
/db\_xref="CDD:237027"  
Region 381..>471  
/region\_name="DAO\_C"  
/note="C-terminal domain of alpha-glycerophosphate oxidase; pfam16901"  
/db\_xref="CDD:293506"

Mascot: <http://www.matrixscience.com/>
