# Supplementary material for: Metal complexation by histidine-rich peptides confers protective roles against cadmium stress in Escherichia coli as revealed by proteomics analysis
Source: PeerJ journal article supplement (doi:10.7717/peerj.5245), 2018-07-26
Supplement: Supplementary.zip [file Supplementary.zip]

MATRIX SCIENCE MASCOT Search Results

Protein View: gi|696588444

alkyl hydroperoxide reductase [Aeromonas lacus]

Database: NCBInr  
Score: 135  
Nominal mass (M<sub>r</sub>): 20716  
Calculated pI: 5.01  
Taxonomy: Aeromonas lacus

Sequence similarity is available as an NCBI BLAST search of gi|696588444 against nr.

Search parameters

MS data file: 176.mgf  
Enzyme: Trypsin: cuts C-term side of KR unless next residue is P.  
Fixed modifications: Carbamidomethyl (C)  
Variable modifications: Oxidation (M)

Protein sequence coverage: 19%

Matched peptides shown in bold red.

1 MSTYINTEIK PFNATAYHNG **KFVQVSDADL** KGKWSVVFY PADFTFVCPT  
51 ELGDLADNYA DFQKLGVEIY AVSTDTHFTH **KAWHDTSDTI** QKIQYPMIGD  
101 PTGTITRNFG VMIEEAGLAD RGTFFVIDPQG IIQIVEINAG GIGRDALELL  
151 RKVK**AAQYVA** **AHPGEVCPAK** WKEGDATLAP SLDLVGKI

Unformatted sequence string: 188 residues (for pasting into other applications).

Sort peptides by ☒ Residue Number ☐ Increasing Mass ☐ Decreasing Mass

Show predicted peptides also

| Query              | Start - End | Observed | Mr (expt) | Mr (calc) | Delta   | M | Score | Expect | Rank              | U | Peptide             |
|--------------------|-------------|----------|-----------|-----------|---------|---|-------|--------|-------------------|---|---------------------|
| <a href="#">18</a> | 22 - 31     | 561.2500 | 1120.4854 | 1120.5764 | -0.0910 | 0 | 39    | 15     | <a href="#">3</a> |   | K.FVQVSDADLK.G      |
| <a href="#">19</a> | 22 - 31     | 561.2900 | 1120.5654 | 1120.5764 | -0.0110 | 0 | 46    | 2.6    | <a href="#">1</a> |   | K.FVQVSDADLK.G      |
| <a href="#">22</a> | 82 - 92     | 651.3000 | 1300.5854 | 1300.6048 | -0.0193 | 0 | 51    | 0.83   | <a href="#">1</a> | U | K.AWHDTSDTIQK.I     |
| <a href="#">26</a> | 155 - 170   | 834.9100 | 1667.8054 | 1667.8090 | -0.0035 | 0 | 33    | 40     | <a href="#">1</a> |   | K.AAQYVAHPGEVCPAK.W |
| <a href="#">27</a> | 155 - 170   | 556.9600 | 1667.8582 | 1667.8090 | 0.0492  | 0 | 37    | 16     | <a href="#">1</a> |   | K.AAQYVAHPGEVCPAK.W |

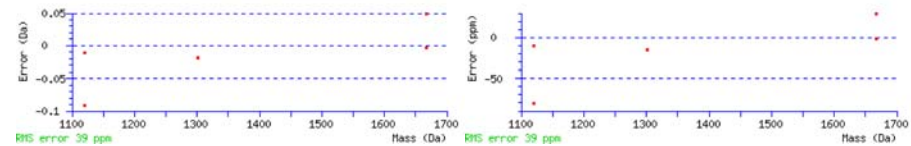

LOCUS WP\_033114482 188 aa linear BCT 07-FEB-2016  
DEFINITION peroxiredoxin [Aeromonas lacus].  
ACCESSION WP\_033114482  
VERSION WP\_033114482.1  
KEYWORDS RefSeq.  
SOURCE Aeromonas lacus  
ORGANISM Aeromonas lacus  
Bacteria; Proteobacteria; Gammaproteobacteria; Aeromonadales;  
Aeromonadaceae; Aeromonas.  
COMMENT REFSEQ: This record represents a single, non-redundant, protein  
sequence which may be annotated on many different RefSeq genomes  
from the same, or different, species.  
COMPLETENESS: full length.  
FEATURES  
source 1..188  
/organism="Aeromonas lacus"  
/db\_xref="taxon:558884"  
Protein 1..188  
/product="peroxiredoxin"  
/calculated\_mol\_wt=20484  
Region 5..188  
/region\_name="AhpC"  
/note="peroxiredoxin; TIGR03137"  
/db\_xref="CDD:211789"  
Region 5..174  
/region\_name="PRX\_Typ2cys"  
/note="Peroxiredoxin (PRX) family, Typical 2-Cys PRX  
subfamily; PRXs are thiol-specific antioxidant (TSA)  
proteins, which confer a protective role in cells through  
its peroxidase activity by reducing hydrogen peroxide,  
peroxynitrite, and organic hydroperoxides; cd03015"  
/db\_xref="CDD:239313"  
Site order(5,46..47,50,110,120,133..135,137..139,143..144,151,  
167..170)  
/site\_type="other"  
/note="dimer interface [polypeptide binding]"  
/db\_xref="CDD:239313"  
Site order(44,78..79,101,103,115)  
/site\_type="other"  
/note="decamer (pentamer of dimers) interface [polypeptide  
binding]"  
/db\_xref="CDD:239313"  
Site order(45,48,121)  
/site\_type="active"  
/note="catalytic triad [active]"  
/db\_xref="CDD:239313"  
Site order(48,167)  
/site\_type="active"  
/note="peroxidatic and resolving cysteines [active]"  
/db\_xref="CDD:239313"

Mascot: <http://www.matrixscience.com/>
